# Supplementary material for: Octopus arm movements under constrained conditions: adaptation, modification and plasticity of motor primitives
Source: Oxford University Press journal article supplement (doi:10.1242/jeb.115915), 2015-02-17
Supplement: jeb115915_supp.pdf [file jeb115915_supp.pdf]

**Movie 1. Reach.** This movie clip shows a typical straight and stereotypical reaching movement with a bend propagation. A loop forms at the site of the hole, which then is the basis for the following bend propagation toward the target.

**Movie 2. Waving.** This movie clip shows a variant and non-stereotypical reaching movement termed ‘waving’, which is not directly aimed at the target.

**Movie 3. Fetch.** This movie clip shows a typical straight and stereotypical fetching movement, a direct pulling-in of the arm.

**Movie 4. Deflected.** This movie clip shows a variant form of the fetching movement, termed ‘deflected’. The subject is not fetching in a single movement.

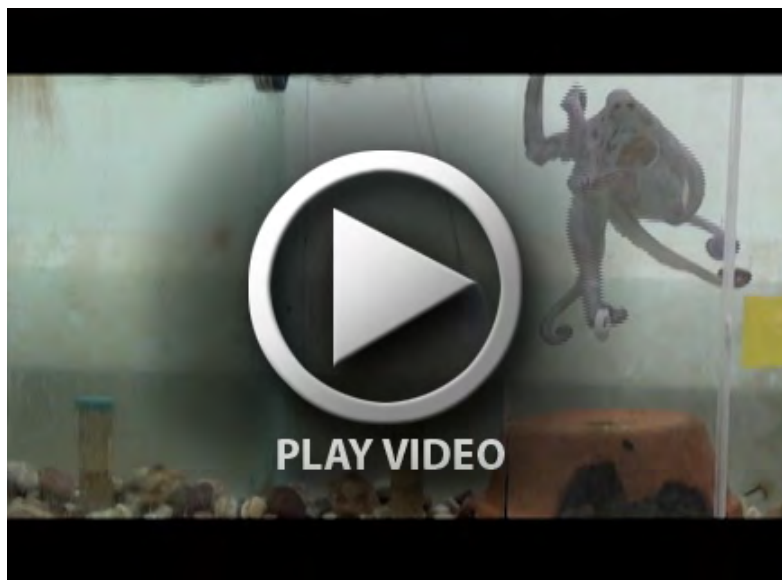

**Movie 1.**

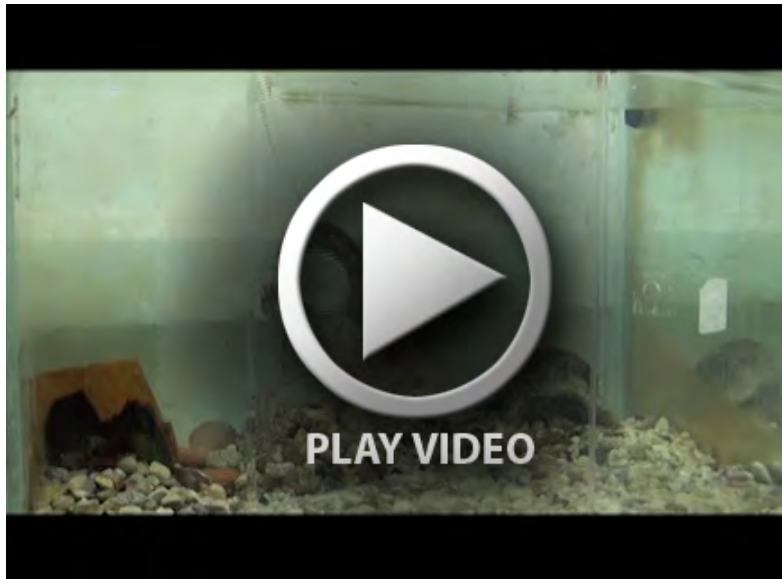

**Movie 2.**

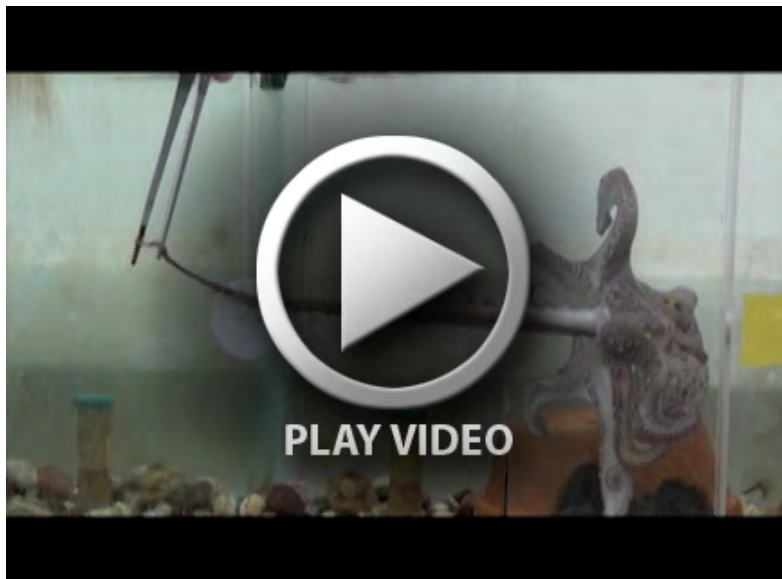

**Movie 3.**

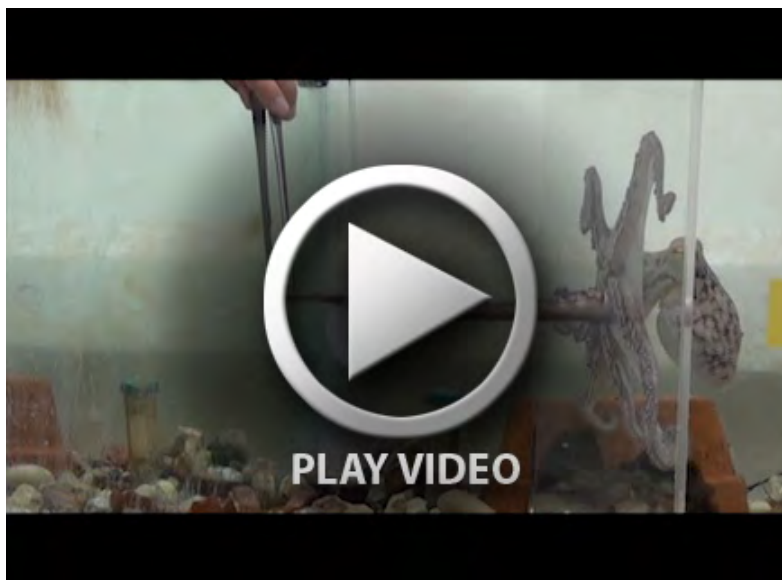

**Movie 4.**
